# Supplementary material for: Effects of awareness of breast cancer overdiagnosis among women with screen-detected or incidentally found breast cancer: a qualitative interview study
Source: PubMed Central journal article supplement — BMJ Open. 2022 Jun 8;12(6):e061211. doi: 10.1136/bmjopen-2022-061211 (PMC9185559; doi:10.1136/bmjopen-2022-061211), 2022-06-08
Supplement: bmjopen-2022-061211supp002.pdf [file bmjopen-2022-061211supp002.pdf]

## Supplementary 2. Interview topic guide

### Screening and diagnosis

So if we could start from the beginning for you, can you take me through how you came to be diagnosed with DCIS/breast cancer?

- How was the diagnosis described to you by your clinician(s)?
- If you can recall, could you describe your immediate thoughts and feelings in response to the diagnosis at the time?
- How do you feel about the diagnosis now?

### Possibility of overdiagnosis

What is your understanding of 'overdiagnosis'? (*re-cap from survey*)

- How did you come to be aware of overdiagnosis?
- How did you feel when you first found out about overdiagnosis?
- What impact has that awareness of overdiagnosis had on you?
- Why have you thought about overdiagnosis in relation to your cancer?
- How does/did this make you feel? What have been the main effects of that possibility for you?

### Treatment

- Did you resist or refuse any particular treatments?
  - Could you explain why you resisted/refused any treatment?
- What have been the main physical, psychological and social effects of treatment for you?
- Do you feel your cancer diagnosis was beneficial in any way?
- Do you think different treatment options could have been possible for you (eg, less aggressive?)

### Reflections

- Given your experience, what would you say to other women who are about to undergo breast screening or who are considering whether to do so?

- How do you think information about overdiagnosis should be handled for women in the future?
  - Should information on overdiagnosis be made available? – given if/when diagnosed or before?
  - Is there anything that could be done better / have made it a better experience for you?
- What are your views about campaigns and advertisements that promote mammogram screening to women?
- Do you have any other comments on detection or diagnosis that you would like to tell us about? Is there anything important that we've missed?
